# Supplementary material
Source: PubMed Central journal article supplement (PMC3118619)
Supplement: supp_00076.2010_legends.pdf [file supp_00076.2010_legends.pdf]

## SUPPLEMENTARY FIGURE LEGENDS.

**Fig. S1.** Analysis and characterization of the iodixanol (OptiPrep) density gradient fractions. *A*, Estimation of density gradient in the fractions after their separation. *B*, Estimation of protein concentration in the fractions after their separation. *C*, Estimation of the FITC-fluorescence intensity in the fractions after their separation.

**Fig. S2.** Aldolase knock-down induces cell shape remodeling and formation of cell protrusions. *A*, Enlarged black and white image of the panel on Fig.8A<sub>5</sub> showing the border of the cells transfected with control siRNA and staining of actin with Alexa-647 conjugated phalloidin. *B*, Enlarged black and white image of the panel on Fig.8C<sub>5</sub> showing the border of the cells transfected with aldolase siRNA-2 and staining of filamentous actin with Alexa-647 conjugated phalloidin.
