# Supplementary material
Source: PubMed Central journal article supplement (PMC3118619)

Figure S1. (AJP\_Cell\_Merkulova\_Revised)

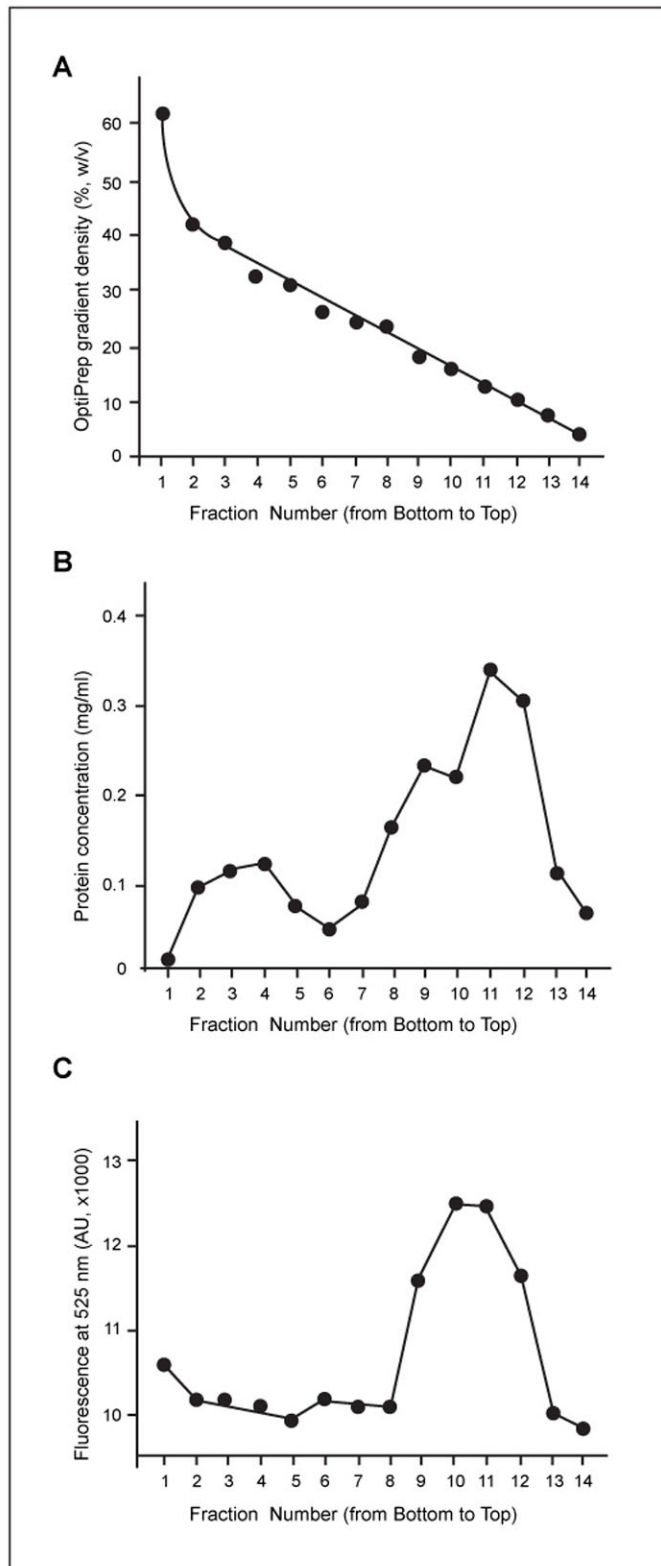

Supplement: supp_00076.2010_figS1.pdf [file supp_00076.2010_figS1.pdf]

Figure S2. (AJP\_Cell\_Merkulova\_Revised)

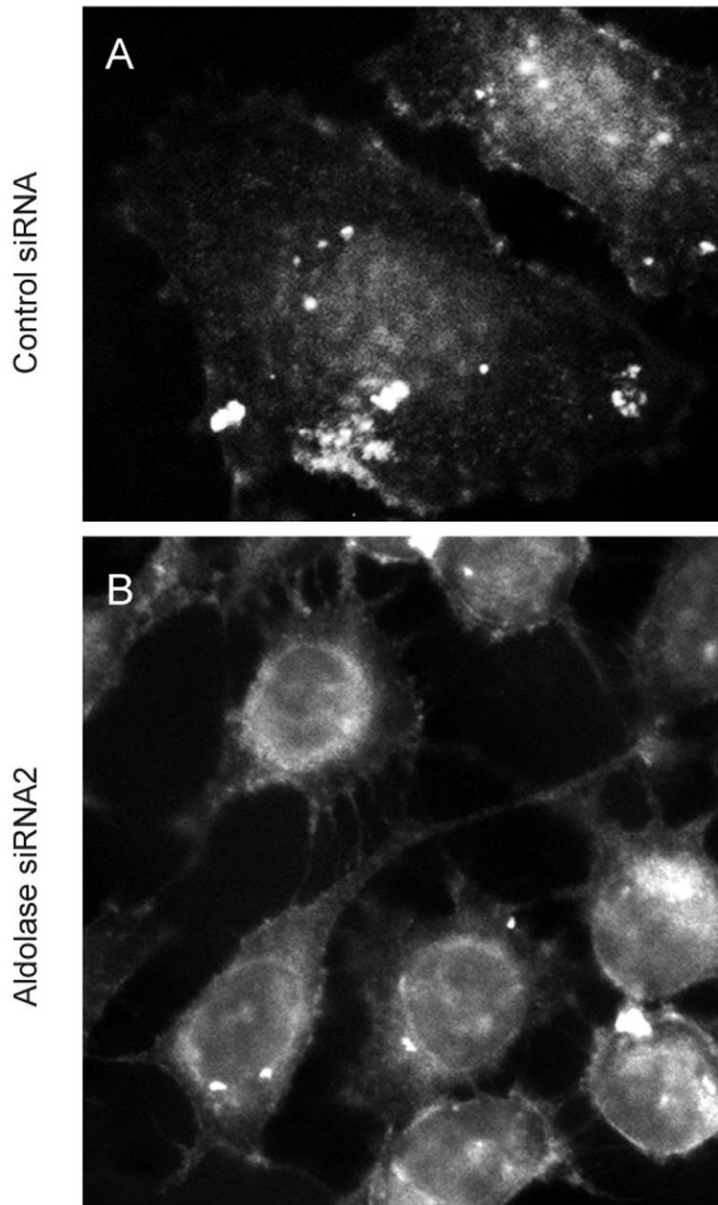

Supplement: supp_00076.2010_figS2.pdf [file supp_00076.2010_figS2.pdf]
